# Supplementary material for: Solvothermally synthesized graphene nanosheets supporting spinel NiFe2O4 nanoparticles as an efficient electrocatalyst for the oxygen reduction reaction
Source: Royal Society of Chemistry journal article supplement (doi:10.1039/c5ra08368k), 2015-01-01
Supplement: c5ra08368k1.pdf [file c5ra08368k1.pdf]

**Electronic Supplementary Information for:**

**Solvothermally synthesized graphene nanosheets supporting  
spinel NiFe<sub>2</sub>O<sub>4</sub> nanoparticles as an efficient electrocatalyst for  
the oxygen reduction reaction**

Pengxi Li,<sup>a,b</sup> Ruguang Ma,<sup>b,c,d</sup> Yao Zhou,<sup>b,c,d</sup> Yongfang Chen,<sup>b,e</sup> Zhenzhen Zhou,<sup>b,c,d</sup>

Guanghui Liu,<sup>b,c,d</sup> Qian Liu,<sup>\*b,c,d</sup> Guihua Peng,<sup>\*a</sup> and Jiacheng Wang<sup>\*b,c,d</sup>

<sup>a</sup> State Key Laboratory Cultivation Base for the Chemistry and Molecular Engineering of  
Medicinal Resources, Ministry of Science and Technology of China, School of  
Chemistry&Pharmaceutical of Guangxi Normal University, Guilin 541004, Guangxi,China.  
pengguihua164@163.com

<sup>b</sup> State Key Laboratory of High Performance Ceramics and Superfine Microstructure,  
Shanghai Institute of Ceramics, Chinese Academy of Sciences,1295DingxiRoad,Shanghai  
200050,China.jiacheng.wang@mail.sic.ac.cn; qianliu@sunm.shenc.ac.cn

<sup>c</sup> Innovation Center for Inorganic Materials Genomic Science, Shanghai Institute of  
Ceramics, Chinese Academy of Sciences, Shanghai 200050, P. R. China.

<sup>d</sup> Shanghai Institute of Materials Genome, Shanghai, P. R. China.

<sup>e</sup> University of the Chinese Academy of Sciences, Beijing 100049, P. R. China

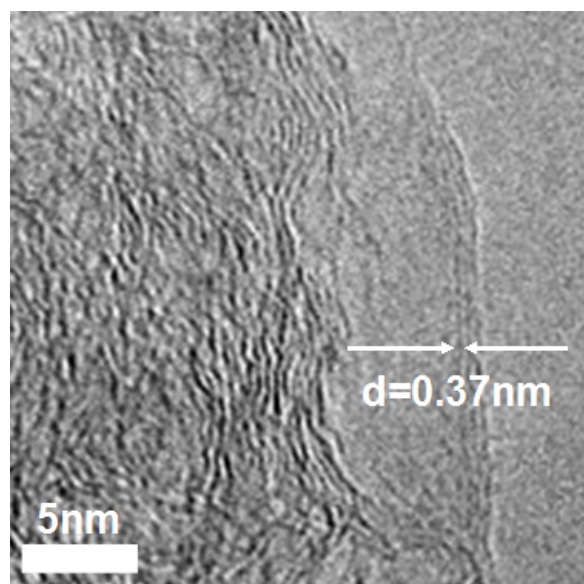

**Fig. S1** High-resolution TEM image of graphene.

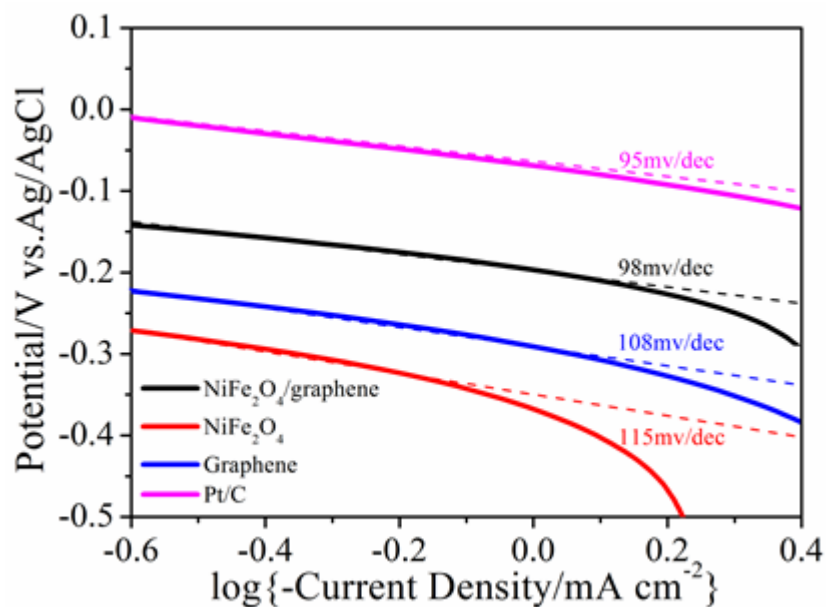

**Fig. S2** Tafel plots of graphene, NiFe<sub>2</sub>O<sub>4</sub>, NiFe<sub>2</sub>O<sub>4</sub>/graphene nanohybrid and commercial Pt/C from the corresponding LSV curves measured in O<sub>2</sub>-saturated 0.1M KOH at a rotating speed of 1600 rpm.

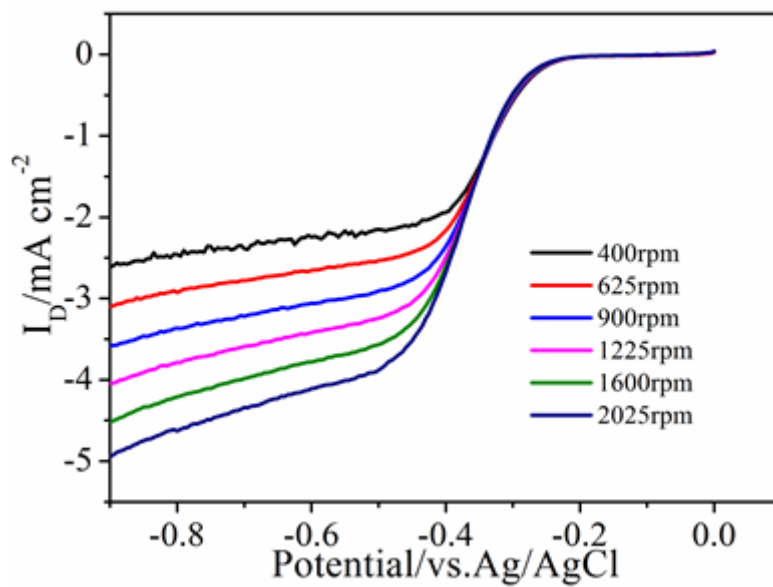

**Fig. S3** LSVs for the ORR of graphene at different rotation rates.

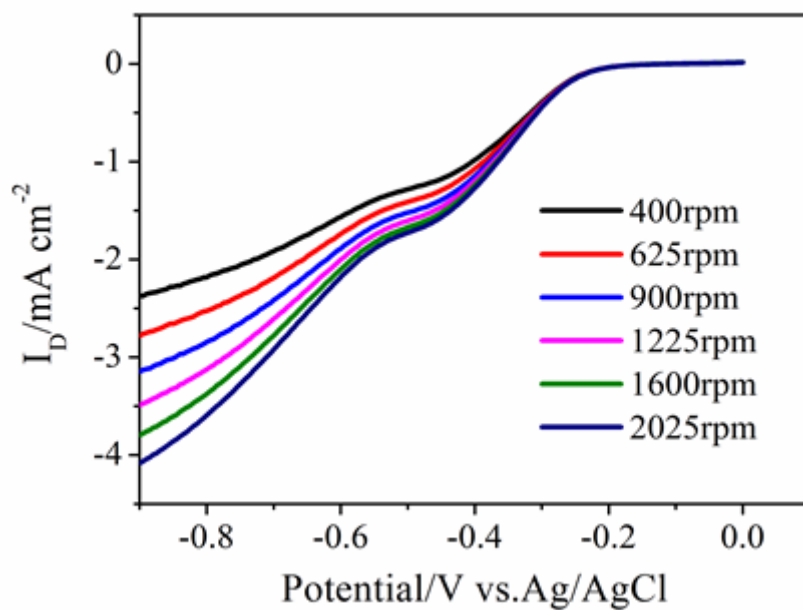

**Fig. S4** LSVs for the ORR of NiFe<sub>2</sub>O<sub>4</sub> at different rotation rates.
